# Supplementary material for: Benzimidazoles Downregulate Mdm2 and MdmX and Activate p53 in MdmX Overexpressing Tumor Cells
Source: MDPI journal article supplement (doi:10.3390/molecules24112152), 2019-06-07

# p53-Luc Agonists

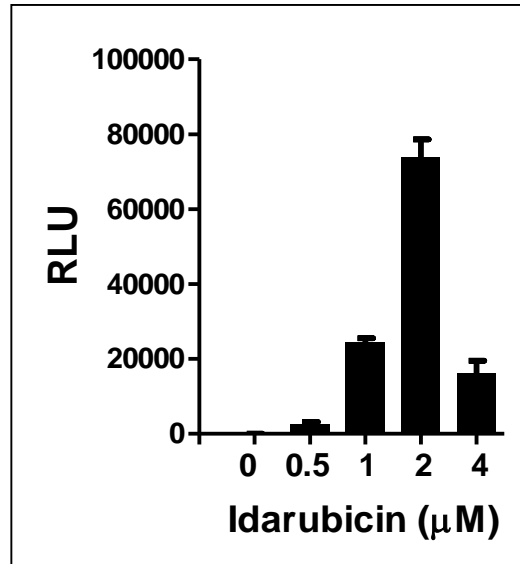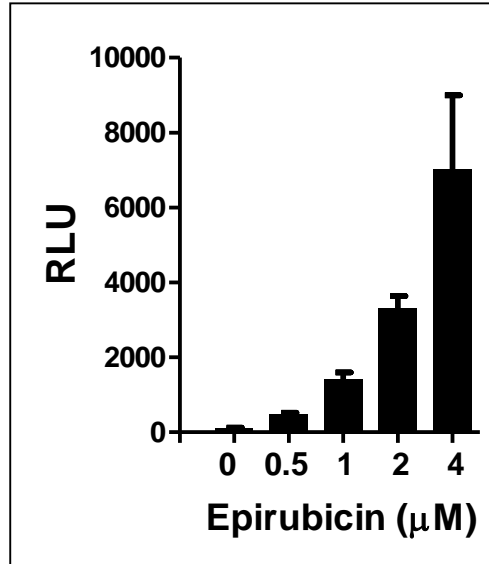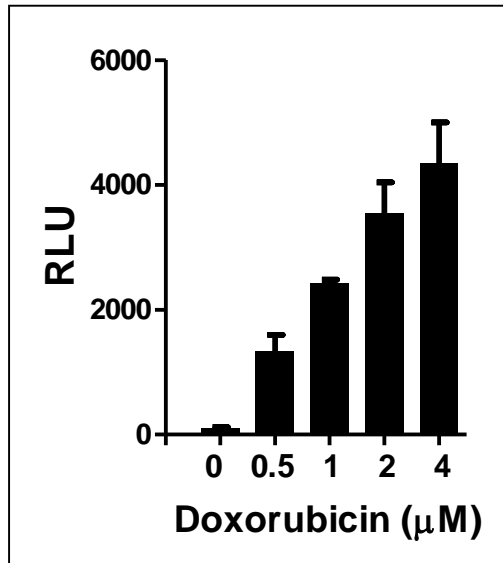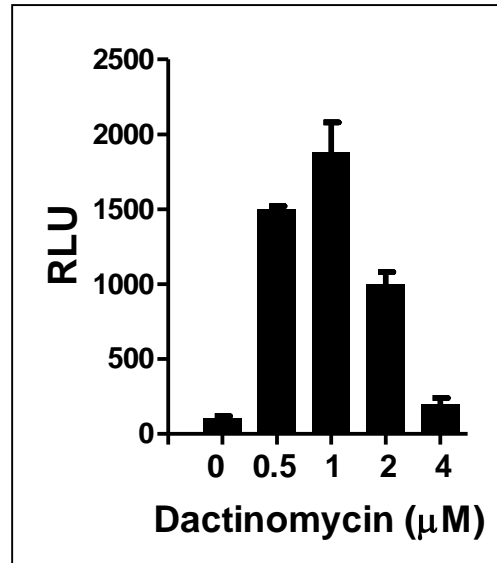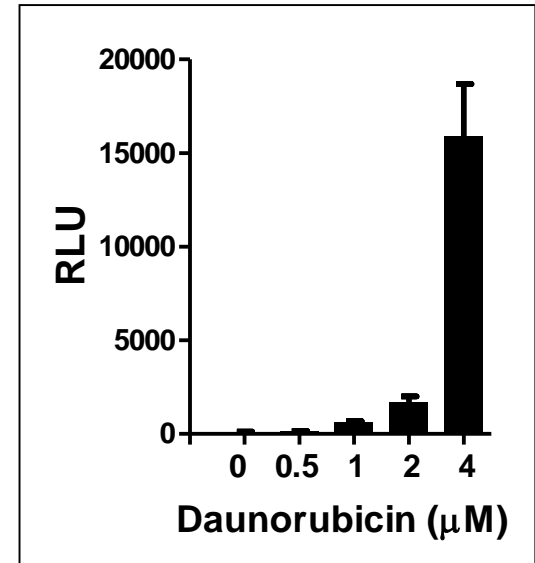

# p53-Luc Agonists

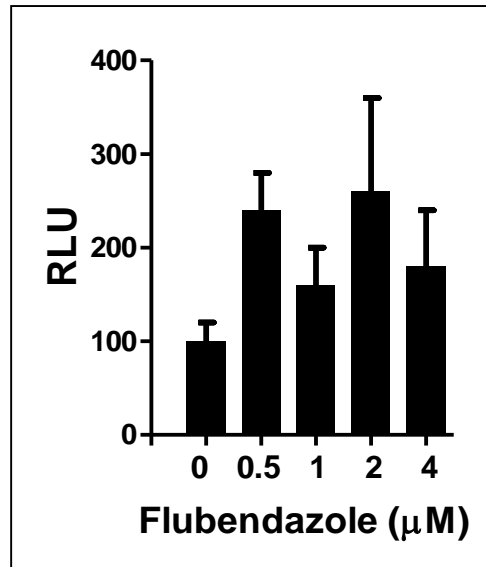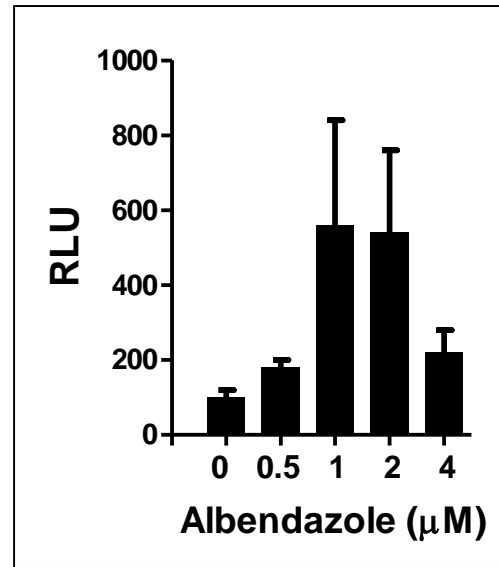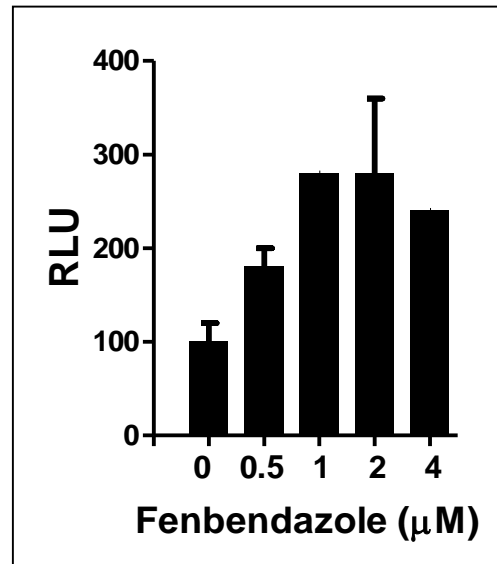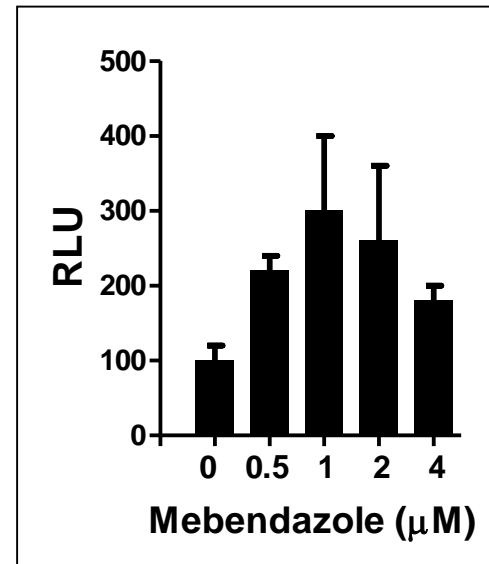

## p53-Luc Agonists

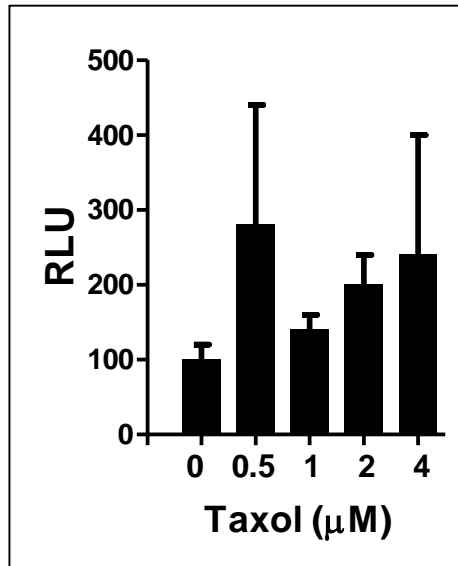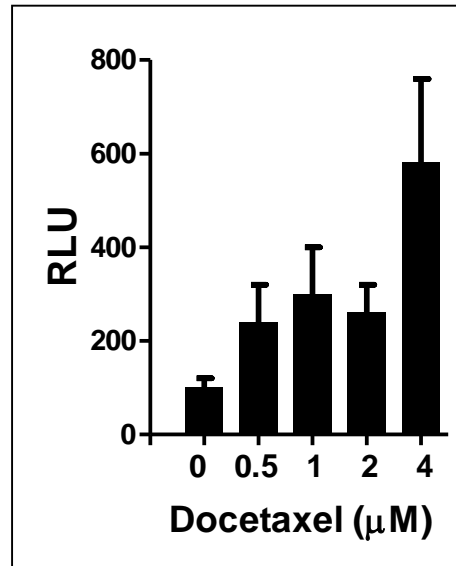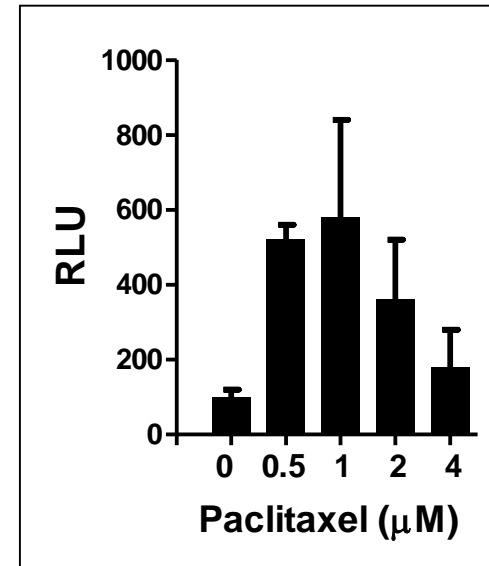

# p53-Luc Agonists

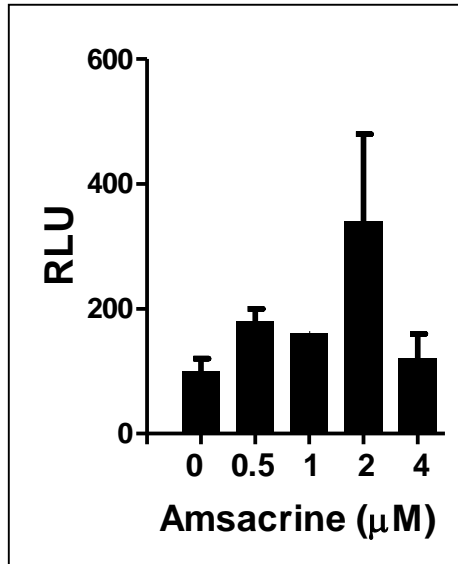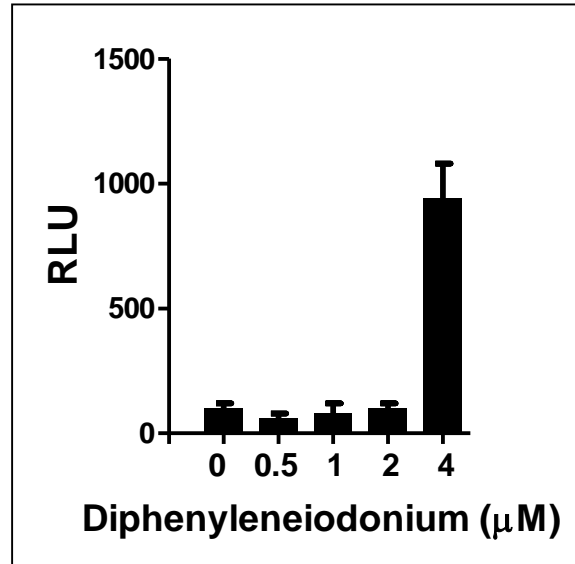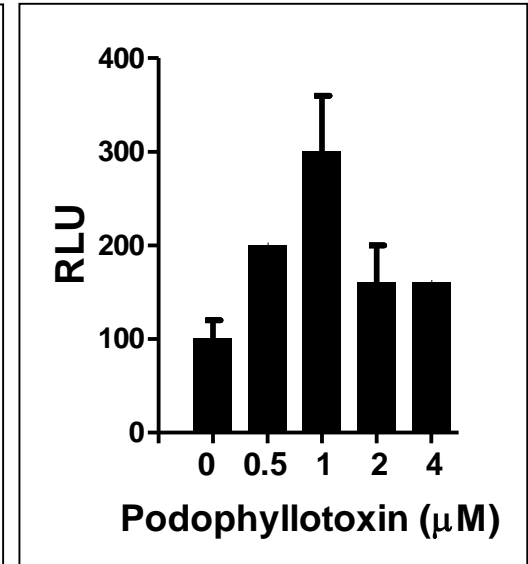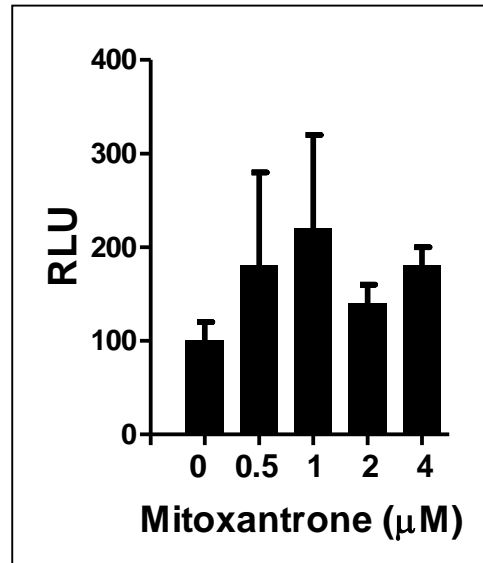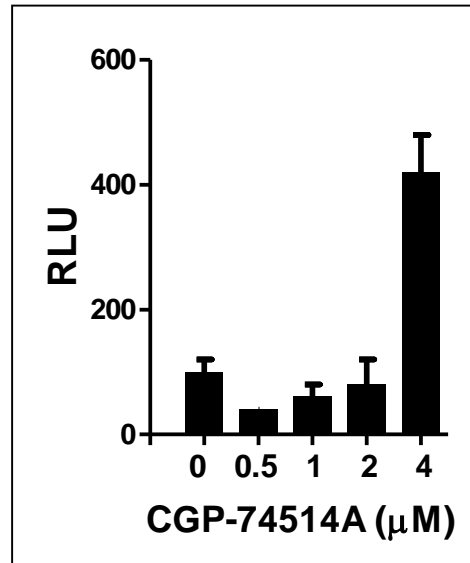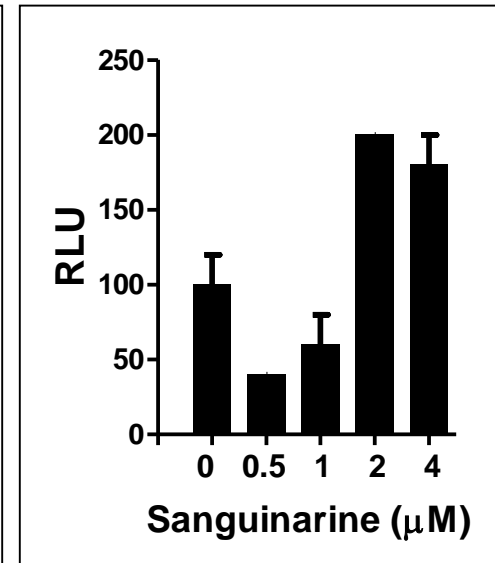

# p53-Luc Synergists

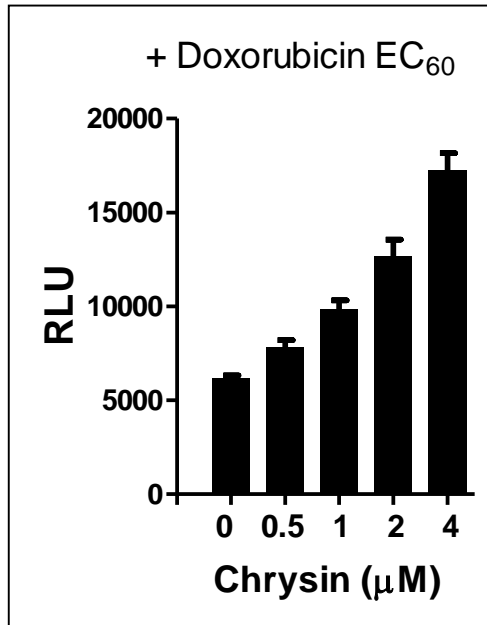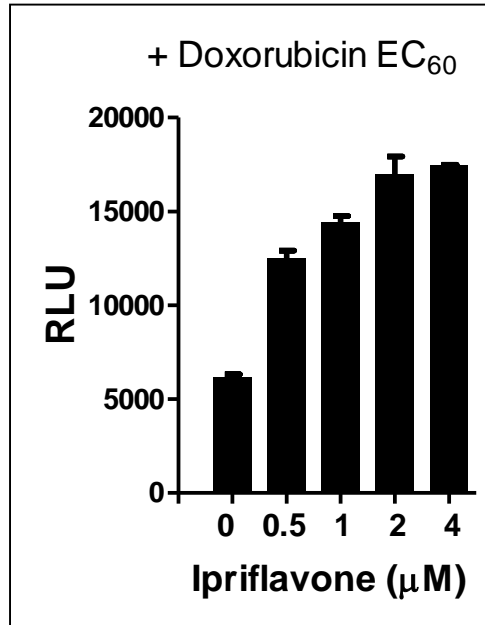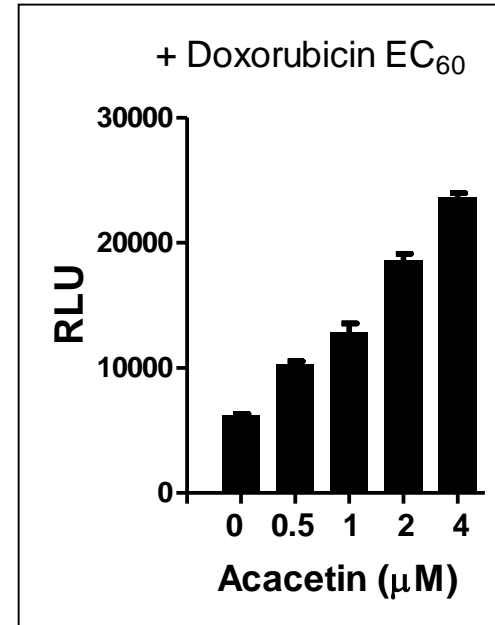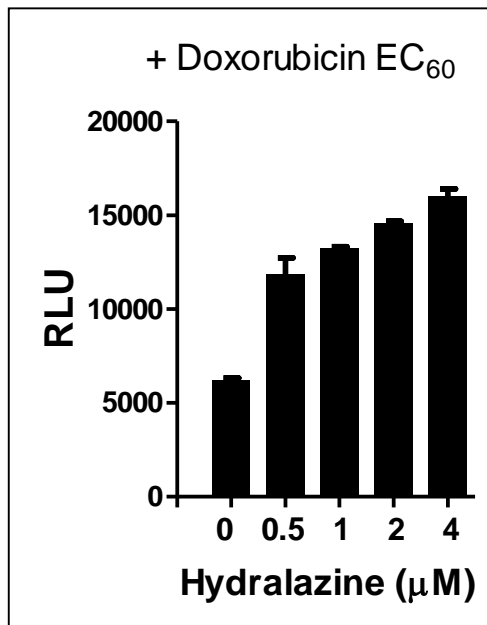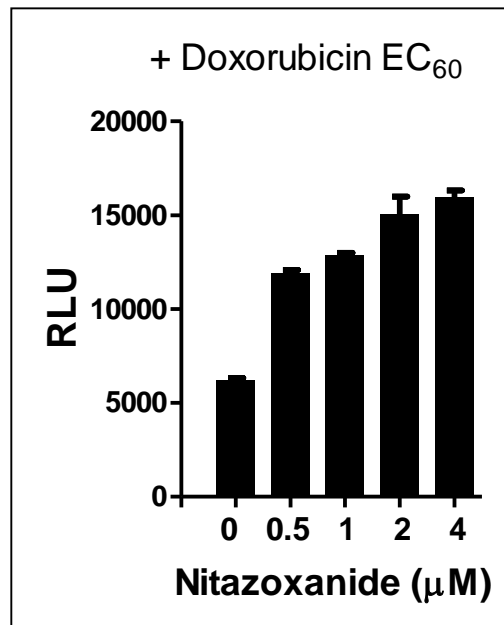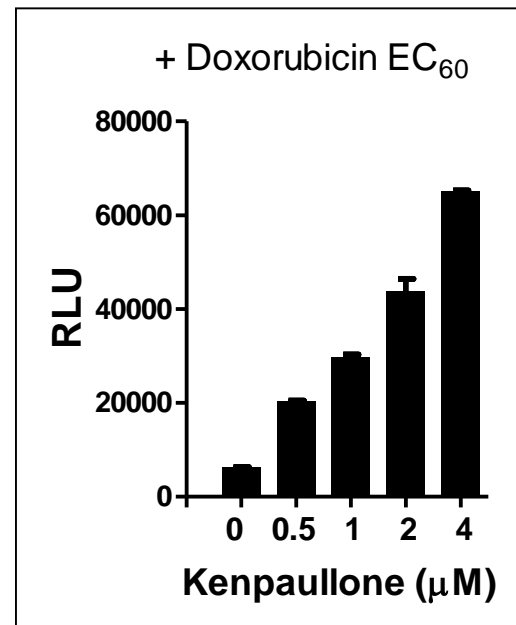

# p53-Luc Synergists

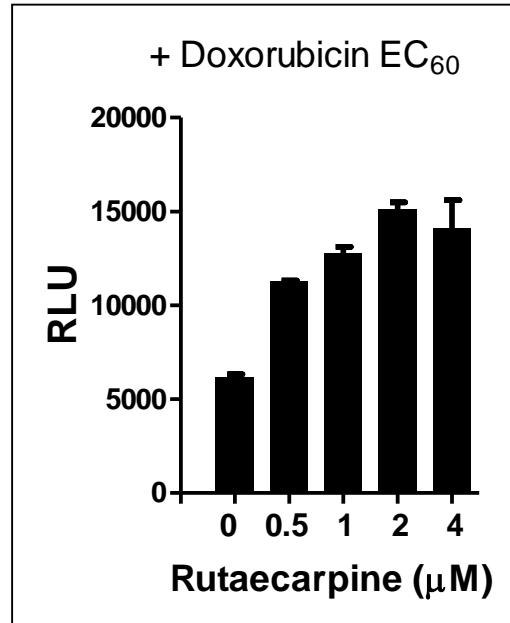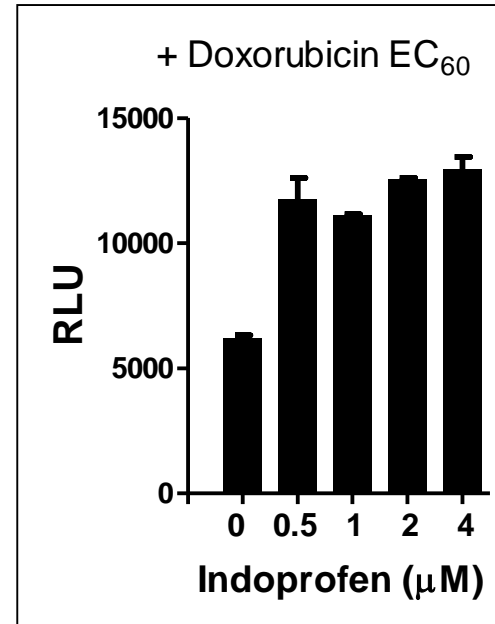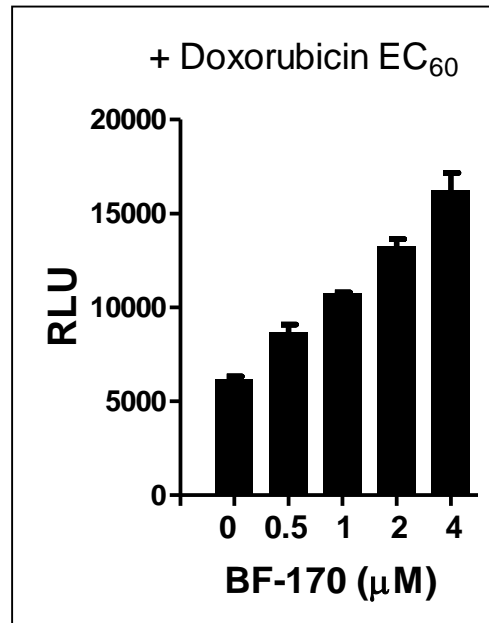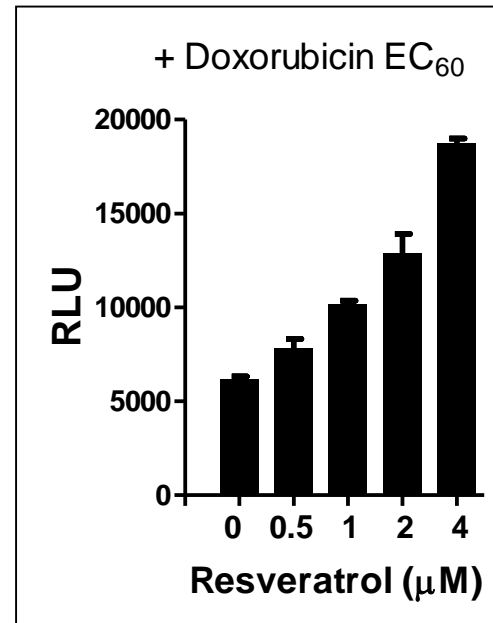

# p53-Luc Agonists and Synergists

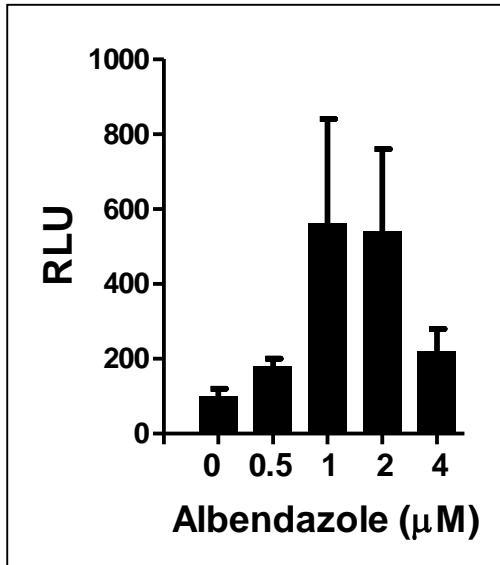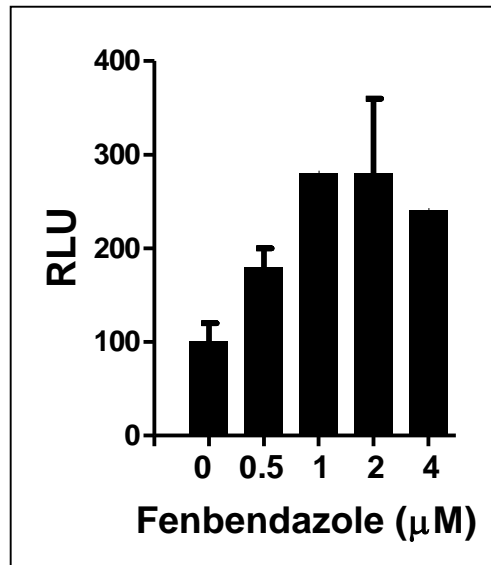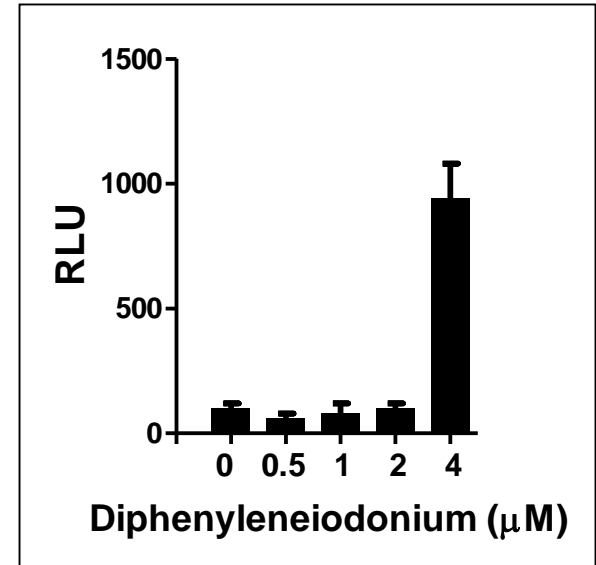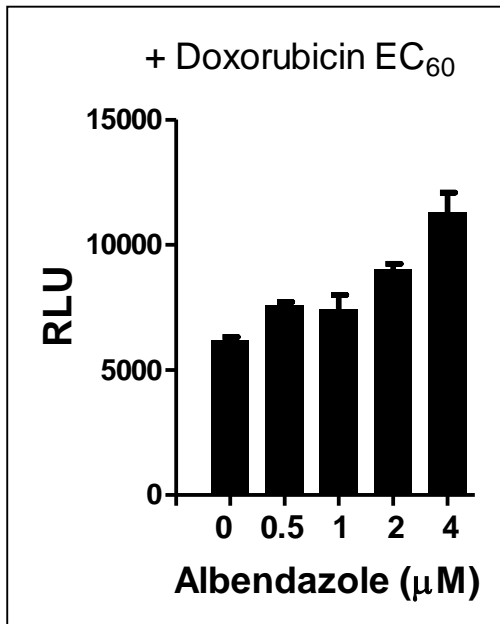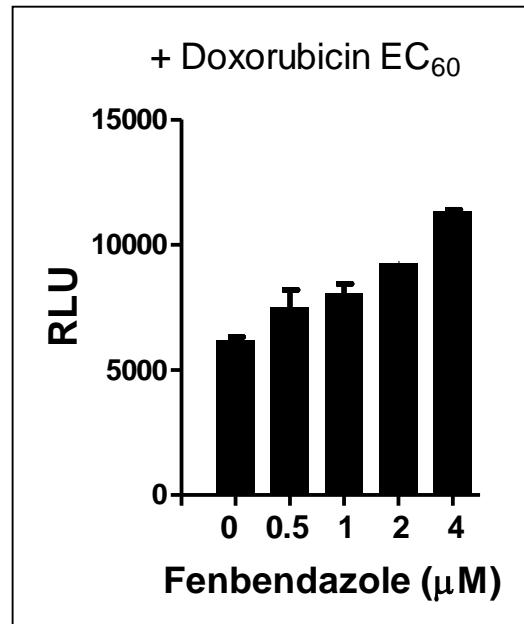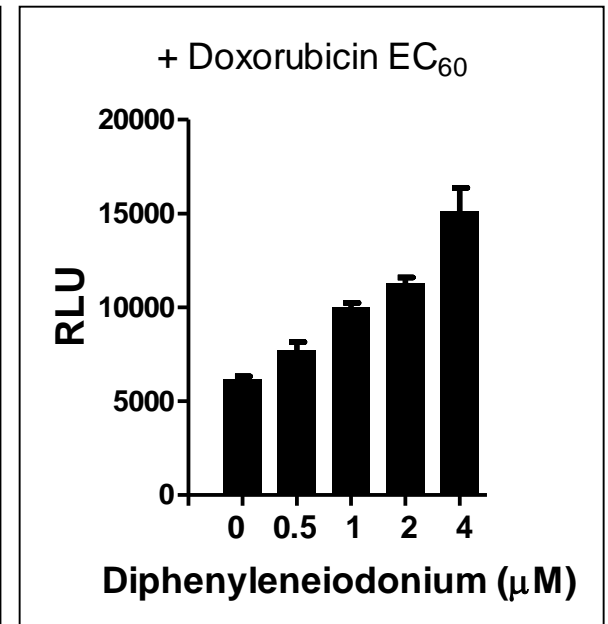

# p53-Luc Antagonists

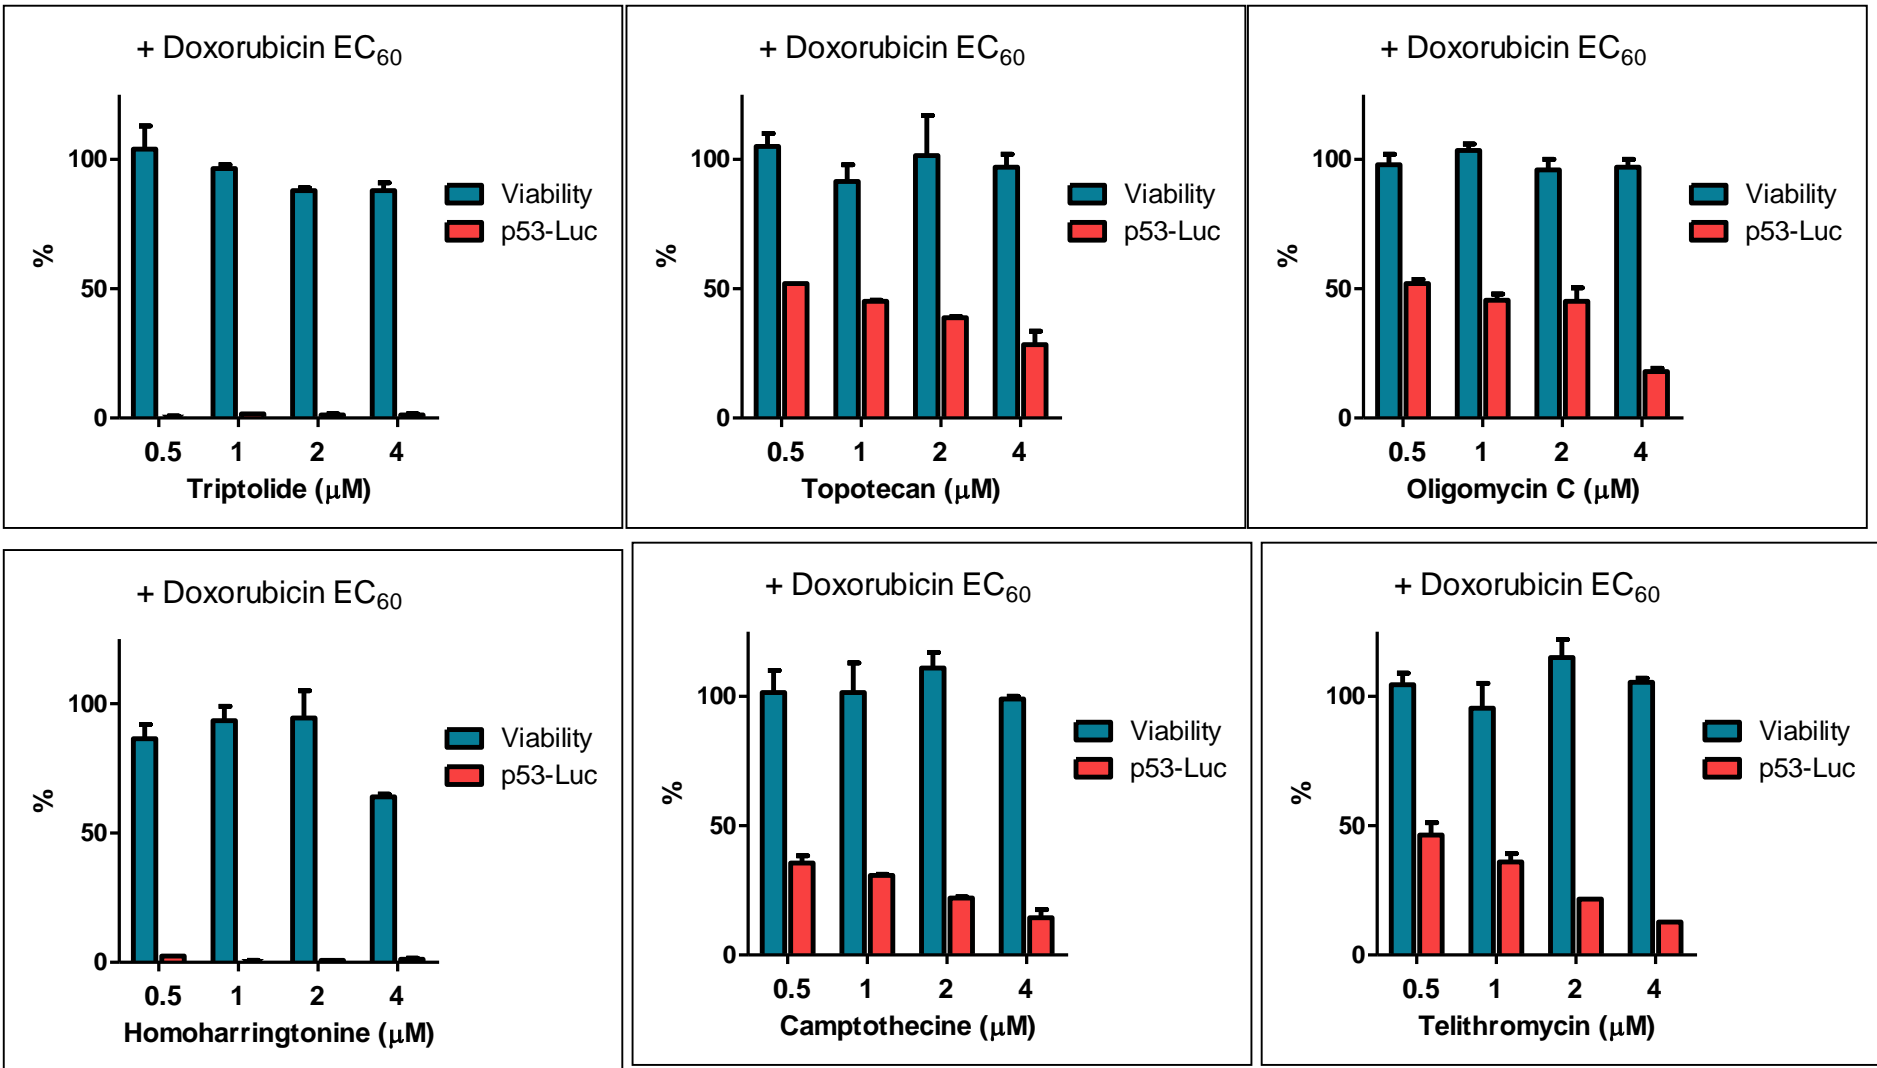



# p53-Luc Antagonists

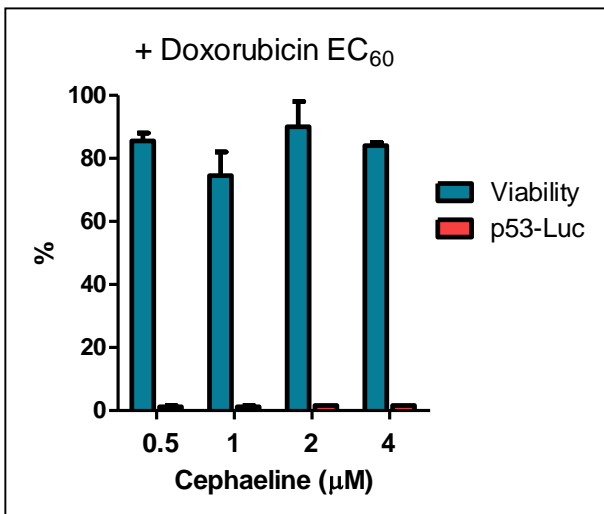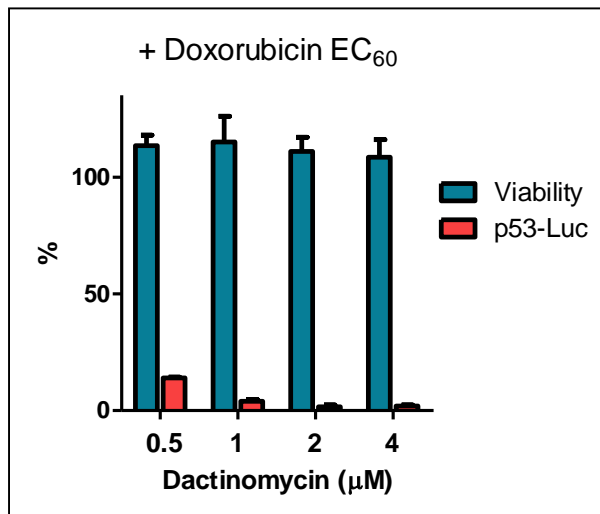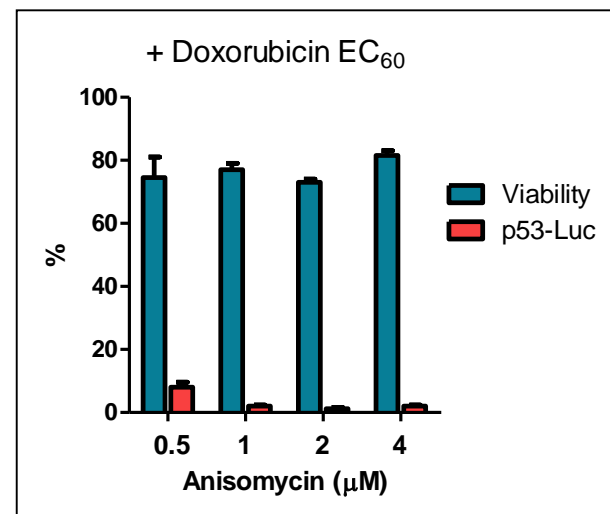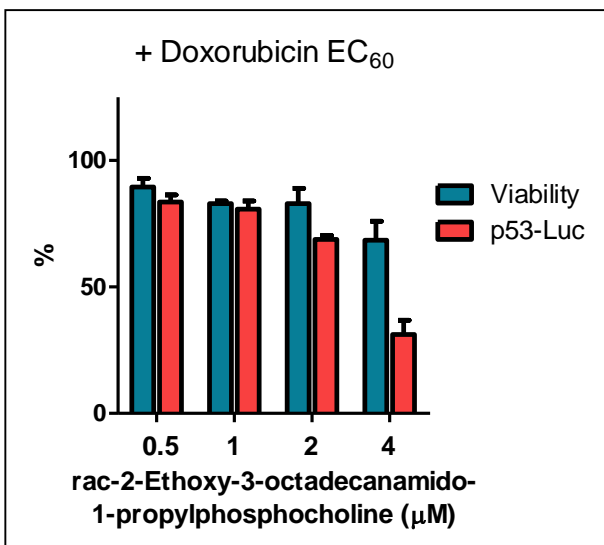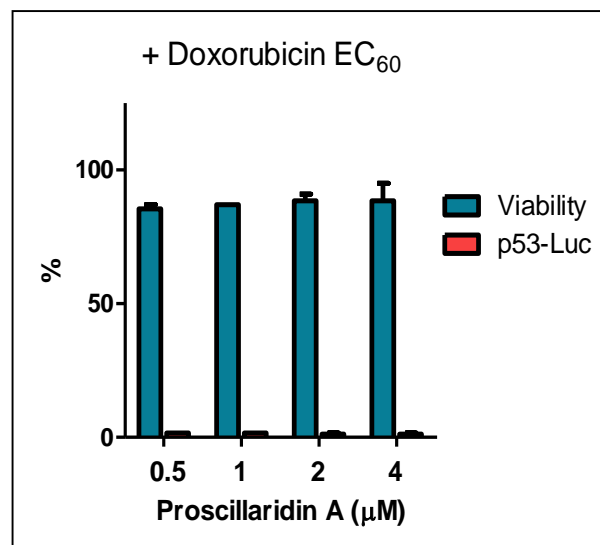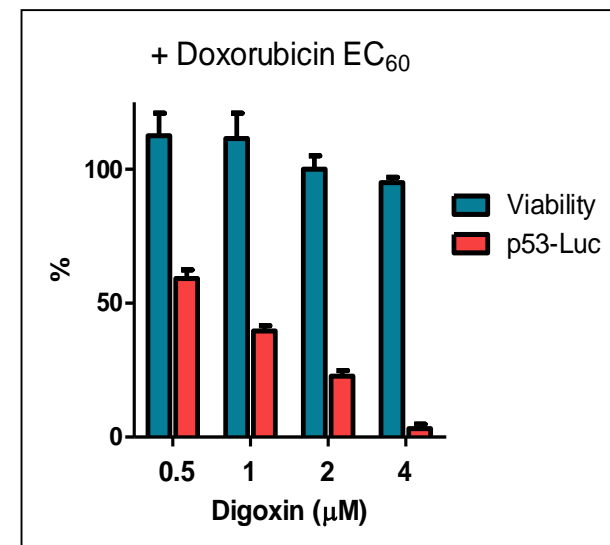

# p53-Luc Antagonists

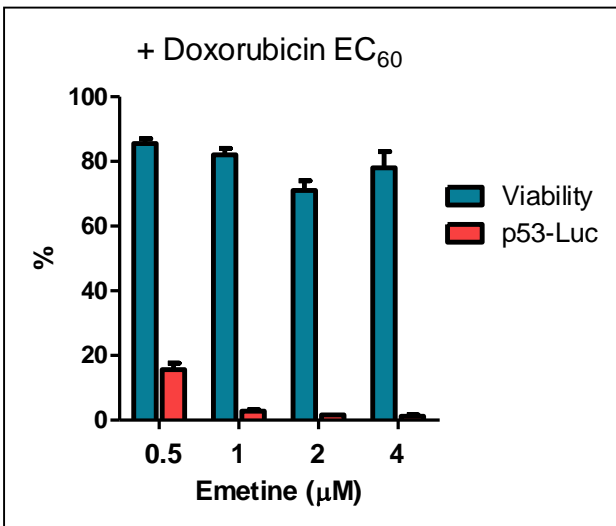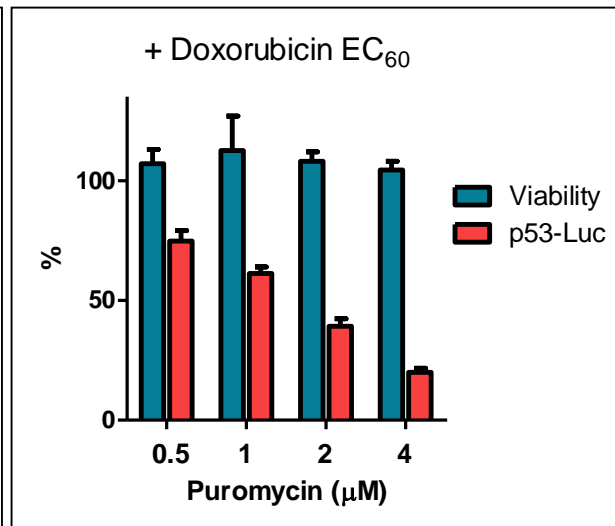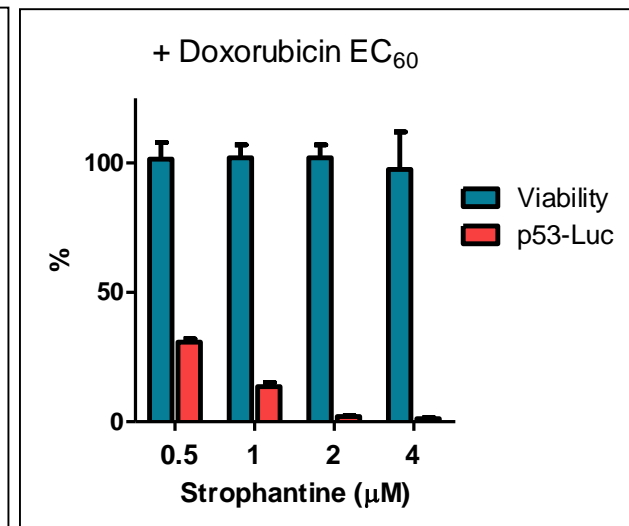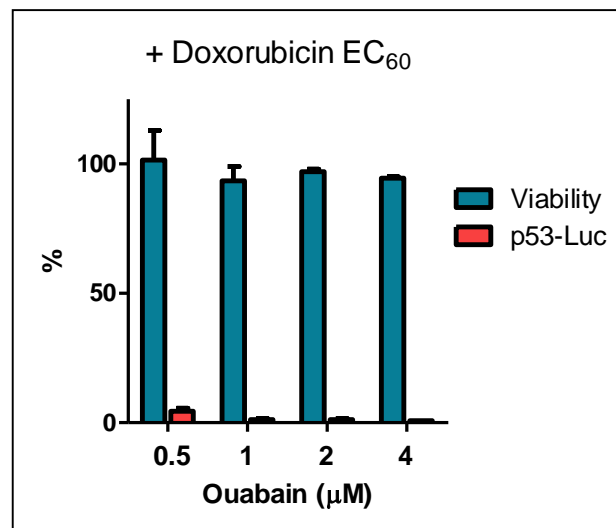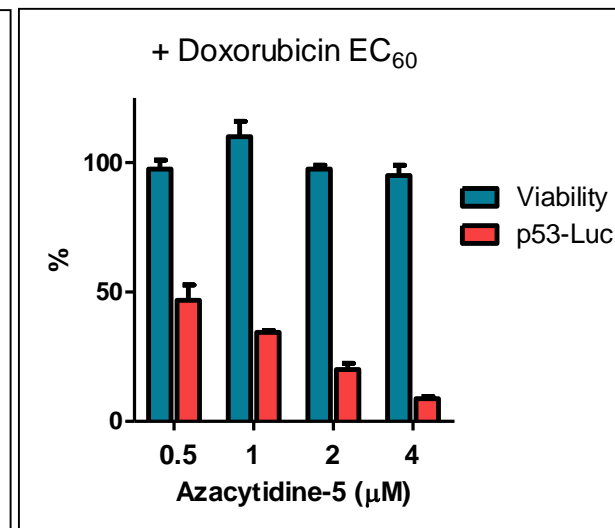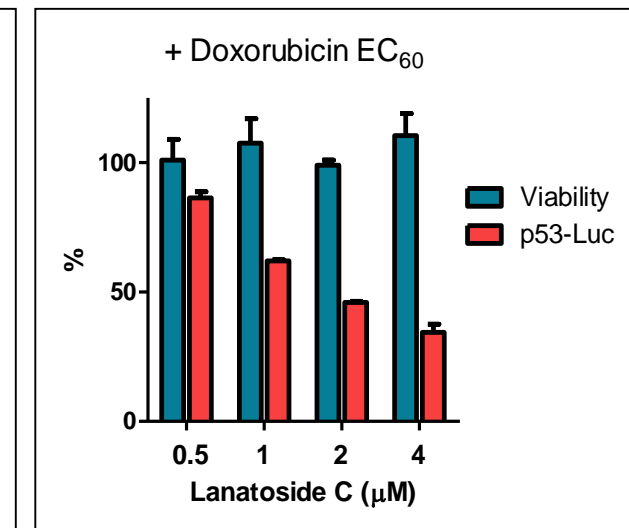

# p53-Luc Antagonists

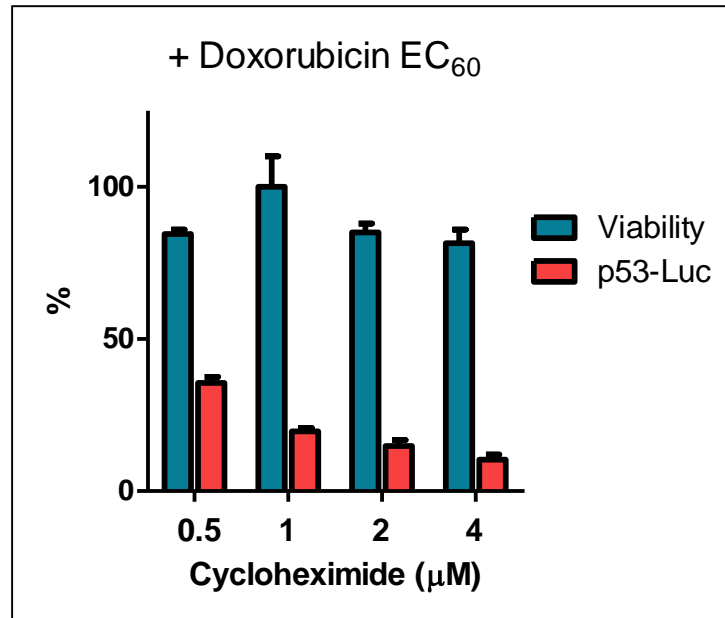

Supplement: s1 [file s1]
